# Supplementary material
Source: PubMed Central journal article supplement (PMC3343337)
Supplement: emboj201254s1.pdf [file emboj201254s1.pdf]

## Supplemental Figures

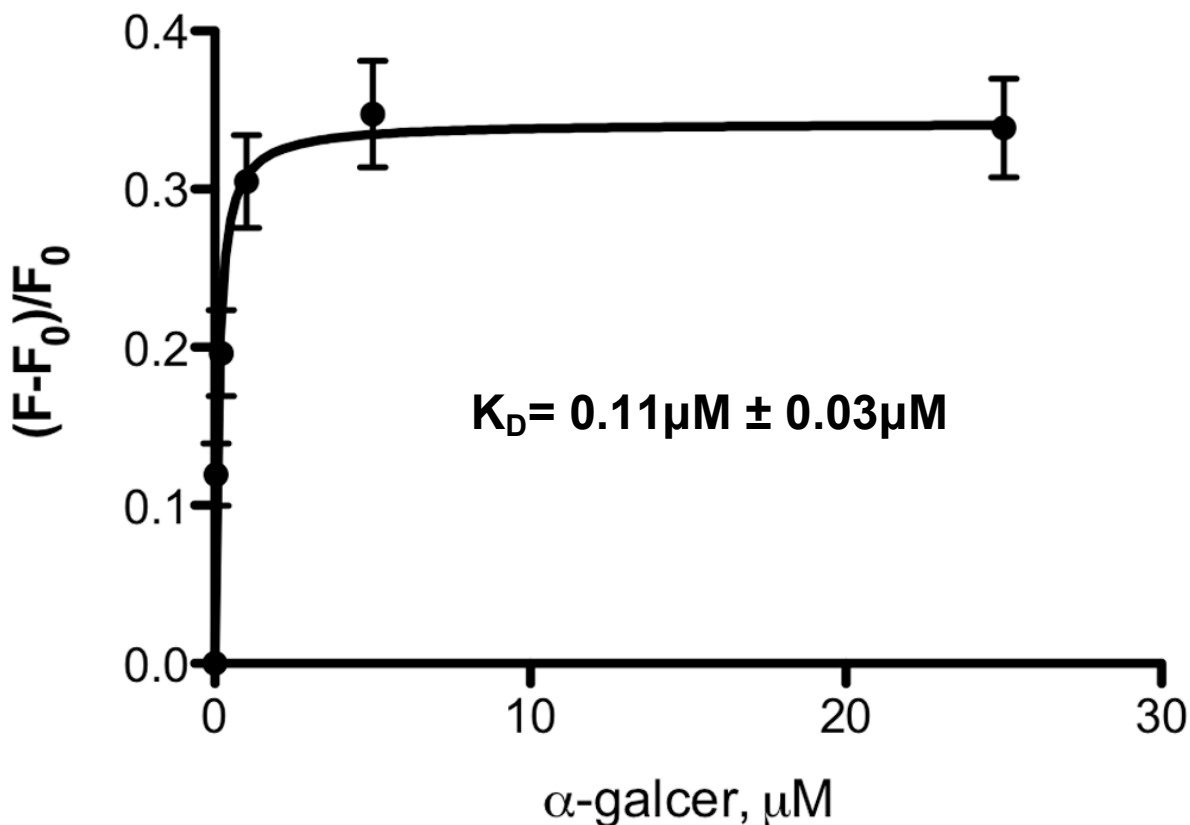

**Supplemental Figure 1A.** The change in intrinsic tryptophan fluorescence of CD1d as a function of titrated amounts of  $\alpha$ GalCer. The increase of tryptophan fluorescence with increasing amounts of LPC was expressed as a ratio  $(E-E_0)/E_0$ , the change in fluorescence divided by the control fluorescence in the absence of added  $\alpha$ GalCer. The data were fit to a one-site binding model to determine the apparent  $K_D$  (as defined in the text) of this interaction.

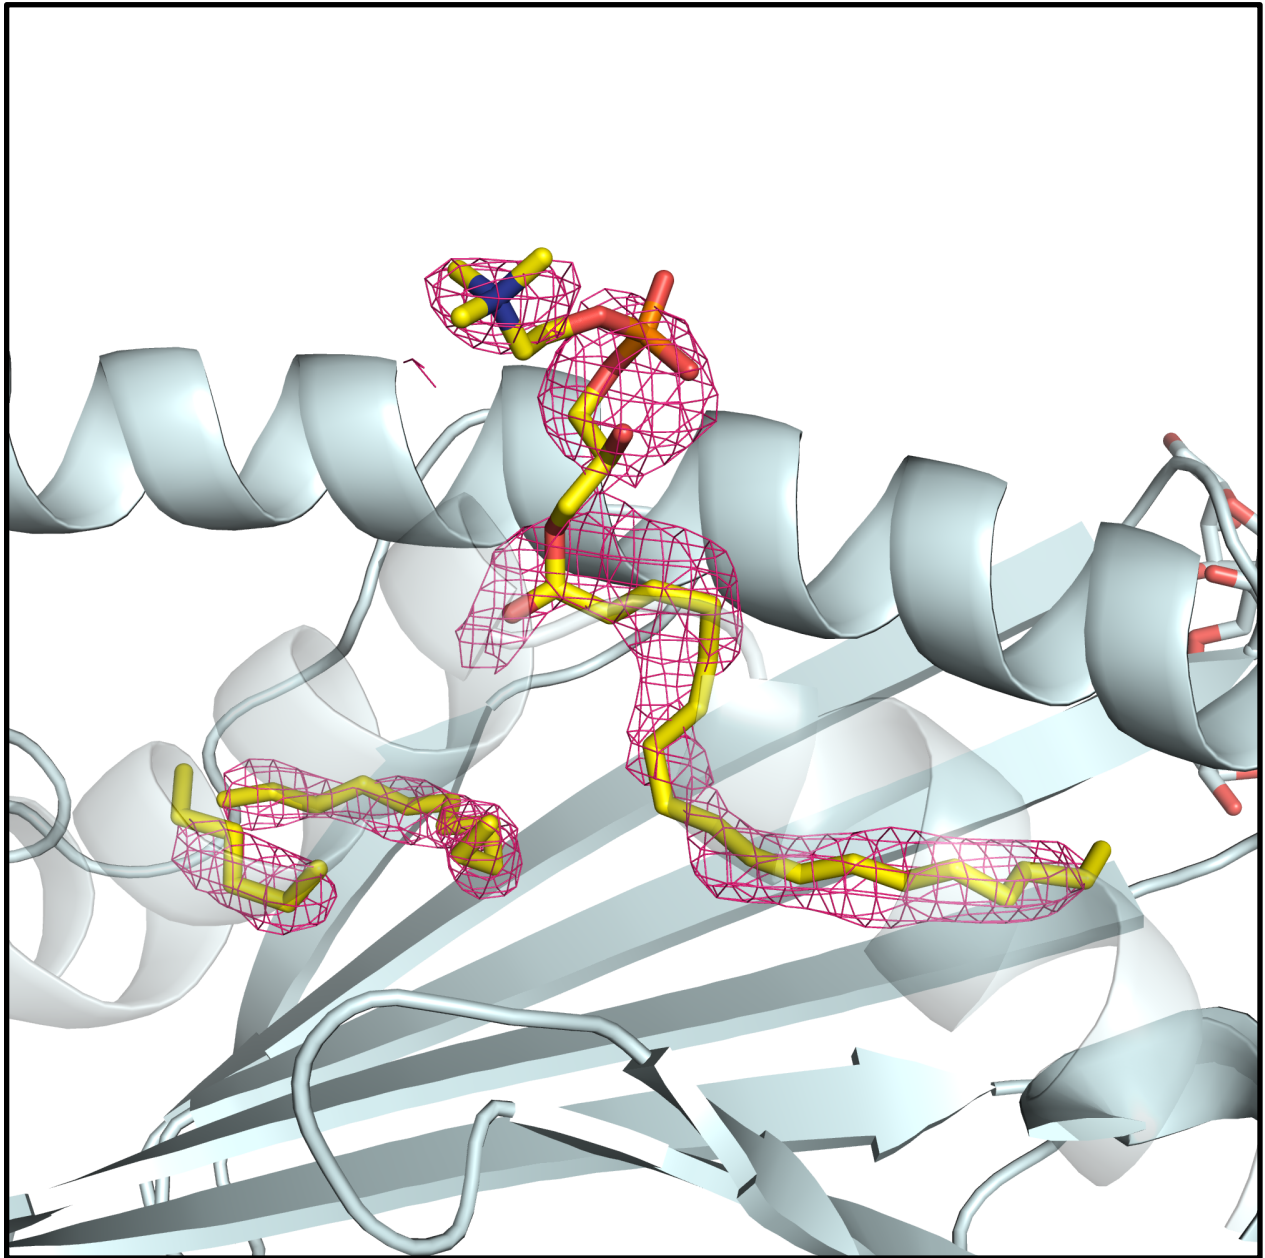

**Supplemental Figure 1B. Omit map electron density of LPC and spacer lipids presented by CD1d.** Side view of the LPC/CD1d binary complex showing omit map electron density in pink, contoured at  $1\sigma$ , for LPC and the C6 and C11 spacer lipids. The  $\alpha 1$  helix has been made transparent for optimal viewing.

## $\alpha$ -GalCer

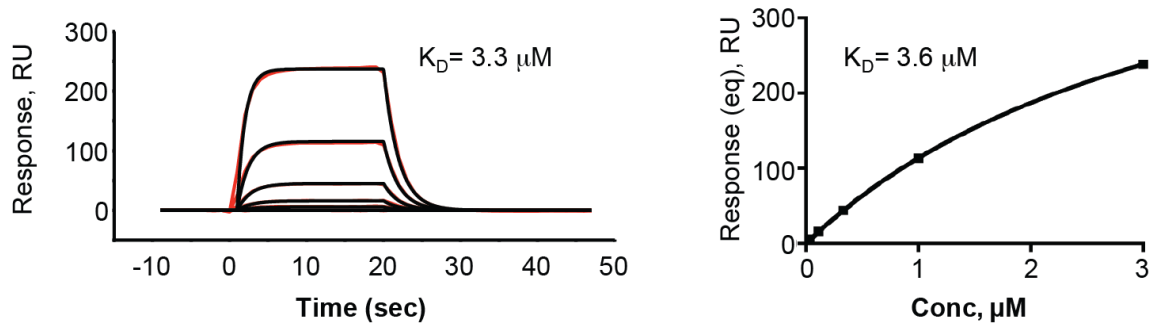

**Supplemental Figure 2. Surface Plasmon Resonance measurements of iNKT-TCR binding to CD1d- $\alpha$ GalCer.** Left panel: SPR traces of the LPC reactive iNKT-TCR (immobilized on chip) with  $\alpha$ GalCer loaded CD1d as analyte. Curve fits are shown in red and were used to calculate the dissociation constant ( $K_D$ ). Right panel:  $K_D$  calculated from equilibrium fits of saturation levels.
